# Supplementary material
Source: publisher figshare collection journal article supplement (https://gsapubs.figshare.com/articles/dataset/_/12528230)
Supplement: Supplementary file 1 [file 1]

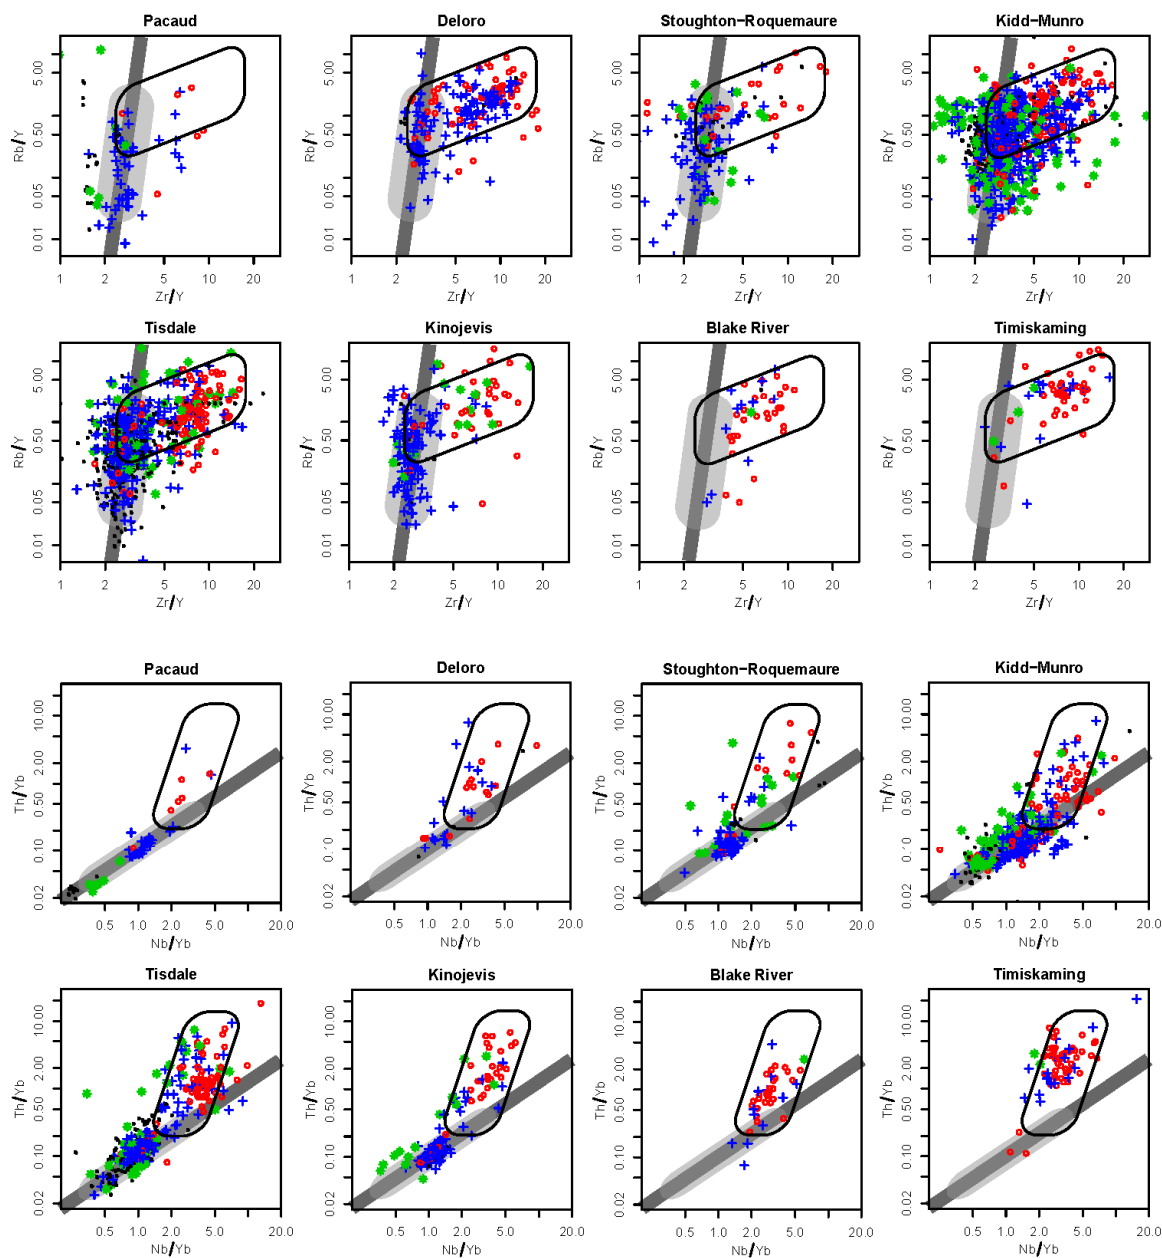

**Supplementary Figure DR1:** Geochemical features of mafic rocks ( $\text{SiO}_2 < 62\%$ ) for all the assemblages used in figure 1, using Rb/Y vs. Zr/Y and Th/Yb vs. Nb/Yb (Pearce and Peate, 1995) diagrams. Dark grey line: mantle array; grey field: tholeiitic basalts; thick black line: field of “arc” signatures. Symbols reflect the major elements characteristics of the samples, based on Jensen (1976) classification: circles – calc-alkaline; cross: komatiitic; stars: tholeiitic. The main criteria to classify an assemblage as “arc” or “non-arc” are (i) the position in these diagrams (omitting outliers); (ii) the presence or absence of komatiites; (iii) the existence of intermediate to acid calc-alkaline lavas (not plotted here). See details in Benn and Moyen, 2008; Kerrich et al., 1999a; Kerrich et al., 1999b; Sproule et al., 2002; Wyman, 2003; Wyman et al., 2002.

#### Rock type

- Komatiitic
- ✕ Tholeiitic
- ★ Calc-alkaline
- Unclassified/unknown

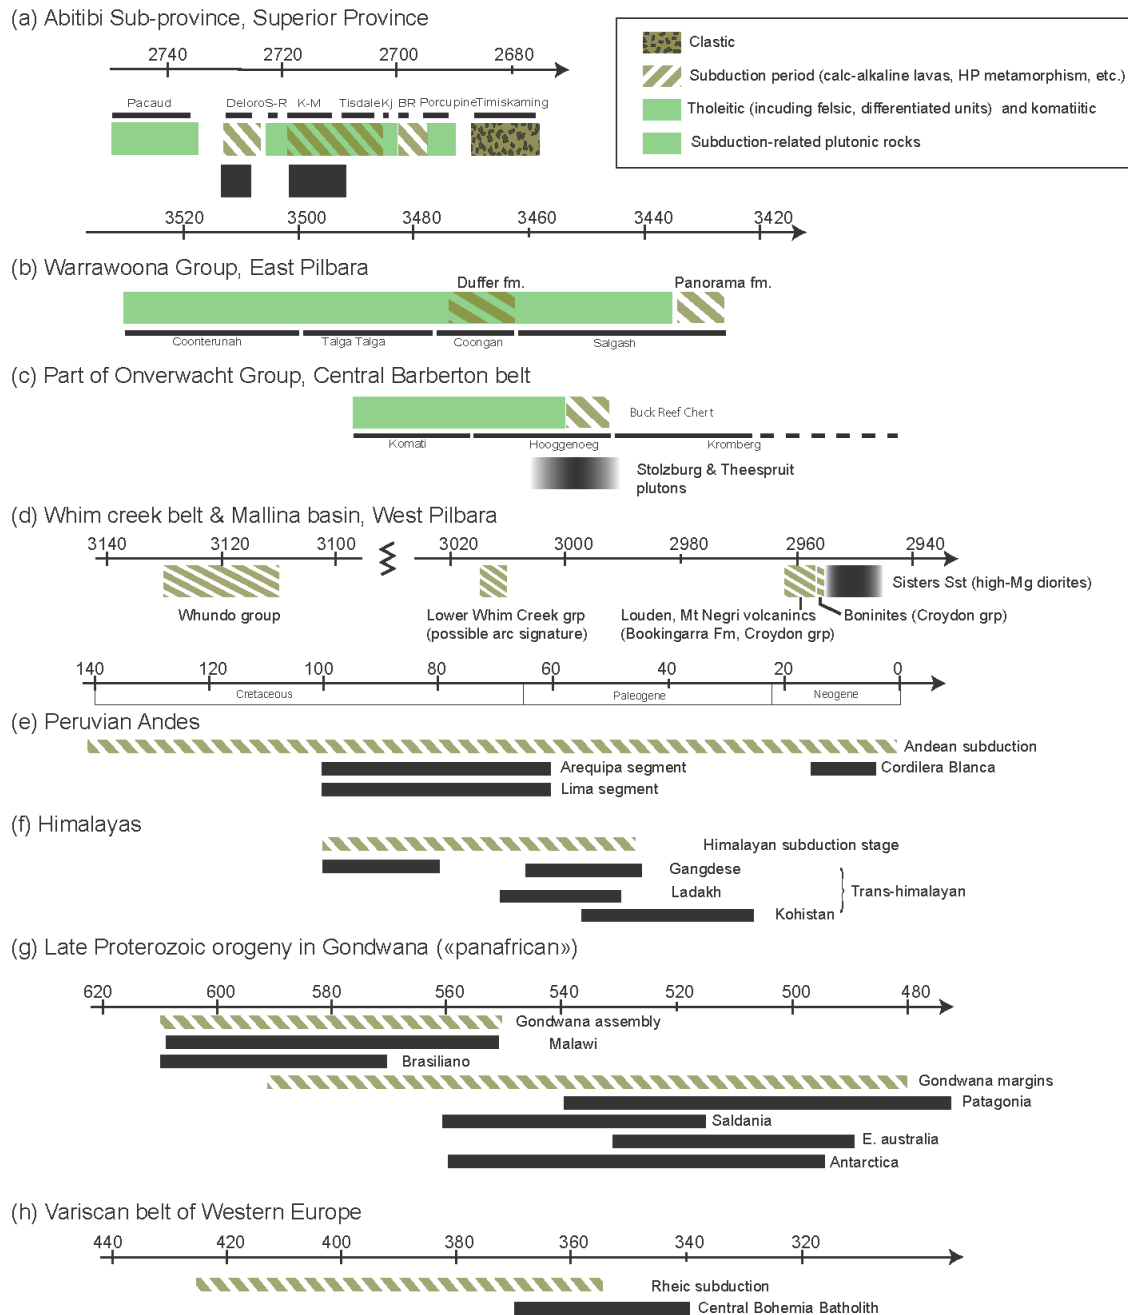

**Supplementary Fig. DR2:** Comparison between the duration of Archaean « arc » events and recent subduction periods. a—d: examples of Archaean events, showing the period with an « arc » magmatism and the period dominated by tholeiitic to komatiitic activity (mostly mafic/ultramafic but in some cases, e.g. East Pilbara, there may be intervening felsic events with the same affinity (Moyen, 2010; Smithies et al., 2007b)). Black boxes correspond to periods of plutonic activity with a demonstrable deep origin (subduction), either the « high pressure TTGs » (Moyen, 2010) or sanukitoids. Hatched boxes correspond to « recorded » subduction events (with a clear geological record such as HP metamorphism, magmatic arc, etc.), and black boxes to calc-alkaline batholiths interpreted as subduction related. A: Abitibi sub-province, after (Benn and Moyen, 2008). B: Warrawoona Group of the East Pilbara (Smithies et al., 2007a; Van Kranendonk et al., 2007); C: Middle part of the Onverwacht group of the Barberton Greenstone Belt, S. Africa (Lowe and Byerly, 2007); (d) Whim Creek and Mallina basins of the Western Pilbara, Australia (Smithies et al., 2005; Smithies and Champion, 2000; Smithies et al., 2004b). E-h: for reference, timeline of neoproterozoic and younger events, using the same time scale and caption. E: Peruvian Andes and coastal batholiths (Soler and Bonhomme, 1990). F: Himalayas and Asia-Eurasia convergence, and Trans-Himalayan batholith (Weinberg and Dunlap, 2000; Wen et al., 2008). G: Late-Proterozoic «panafrican» orogenic system, from the compilation in (Cawood and Buchan, 2007). H: Hercynian belt of W. Europe and Bohemian batholith (Collins, 2003; Janousek et al., 2006).

### Movie DR1: numerical modelling setup and model animation.

All geodynamical model calculations are performed with the numerical finite element code Sepran (Segal and Praagman, 2011). Subduction dynamics are solved using conservation of mass, momentum, thermal energy, and composition in a two-dimensional, 3600x2000-km large model domain, with a composite, stress, temperature, pressure, and composition dependent rheology. Basaltic oceanic crust is weaker than mantle material under the same conditions, and transforms to eclogite at depth over time. The dominant mantle phase transitions from olivine to spinel and spinel to perovskite/magnesiowüstite are included, as they significantly affect the dynamics of downgoing slabs. Further details of the model setup and applied 'default' model parameters are listed in (van Hunen and van den Berg, 2008). An animation of the slab break-off process during subduction in a hotter mantle is available as online supplementary material. The animation illustrates how subduction is repeatedly interrupted by slab break-off.

### References:

- Benn, K., and Moyen, J.-F., 2008, Geodynamic origin and tectonomagmatic evolution of the Late Archean Abitibi-Opatika terrane, Superior Province: Magmatic modification of a plateau-type crust and plume-subduction interaction *in* Condie, K.C., and Pease, V., eds., When did plate tectonics begin on Earth?: Special Paper: Boulder, Geological Society of America, p. 173-198.
- Cawood, P., and Buchan, C., 2007, Linking accretionary orogenesis with supercontinent assembly: *Earth-Science Reviews*, v. 82, p. 217-256.
- Collins, W.J., 2003, Slab pull, mantle convection, and Pangaeian assembly and dispersal: *Earth and Planetary Science Letters*, v. 205, p. 225-237.
- Janousek, V., Gerdes, A., VrÁNa, S., Finger, F., Erban, V., Friedl, G., and BRAITHWAITE JR, C., 2006, Low-pressure granulites of the Lisov Massif, Southern Bohemia: Visean metamorphism of Late Devonian plutonic arc rocks: *Journal of Petrology*, v. 47, p. 705.
- Jensen, L.S., 1976, A new cation plot for classifying subalkalic volcanic rocks, Ontario Geological Survey Special Paper, Volume 66.
- Kerrick, R., Polat, A., Wyman, D., and Hollings, P., 1999a, Trace element systematics of Mg-, to Fe-tholeiitic basalt suites of the Superior Province: implications for Archean mantle reservoirs and greenstone belt genesis: *Lithos*, v. 46, p. 163-187.
- Kerrick, R., Wyman, D., Hollings, P., and Polat, A., 1999b, Variability of Nb/U and Th/La in 3.0 to 2.7 Ga Superior Province ocean plateau basalts: implications for the timing of continental growth and lithosphere recycling: *Earth and Planetary Science Letters*, v. 168, p. 101-115.
- Lowe, D.R., and Byerly, G.R., 2007, An overview of the geology of the Barberton greenstone belt and vicinity: implications for early crustal development, *in* Van Kranendonk, M.J., Smithies, R.H., and Bennett, V., eds., *Earth's Oldest Rocks: Developments in Precambrian Geology*, Elsevier, p. 481-526.
- Moyen, J.-F., 2010, The composite Archaean grey gneisses: petrological significance, and evidence for a non-unique tectonic setting for Archaean crustal growth.: *Lithos*, v. in press.
- Pearce, J.A., and Peate, D.W., 1995, Tectonic implications of the composition of volcanic arc magmas: *Annual Review of Earth and Planetary Sciences*, v. 23, p. 2851-285.
- Segal, A., and Praagman, N.P., 2011, The Sepran FEM Package, Ingenieursbureau Sepra, The Netherlands, <http://ta.twi.tudelft.nl/sepran/sepran.html>.
- Smithies, R., Champion, D., Van Kranendonk, M., Howard, H., and Hickman, A., 2005, Modern-style subduction processes in the Mesoarchaeon: Geochemical evidence from the 3.12 Ga Whundo intra-oceanic arc: *Earth and Planetary Science Letters*, v. 231, p. 221-237.
- Smithies, R., Van Kranendonk, M., and Champion, D., 2007a, The Mesoarchean emergence of modern-style subduction: *Gondwana Research*, v. 11, p. 50-68.
- Smithies, R.H., and Champion, D.C., 2000, The Archaean high-Mg diorite suite: Links to Tonalite-Trondhjemite-Granodiorite magmatism and implications for early Archaean crustal growth: *Journal of Petrology*, v. 41, p. 1653-1671.

- Smithies, R.H., Champion, D.C., and Sun, S.S., 2004, Evidence for Early LREE-enriched mantle source regions: diverse magmas from the c. 3.0 Ga Mallina Basin, Pilbara Craton, NW Australia: *Journal of Petrology*, v. 45, p. 1515-1537.
- Smithies, R.H., Champion, D.C., and Van Kranendonk, M.J., 2007b, The oldest well-preserved felsic volcanic rocks on Earth: Geochemical clues to the early evolution of the Pilbara Supergroup and implications for the growth of a Paleoarchean protocontinent, *in* Van Kranendonk, M.J., Smithies, R.H., and Bennet, V., eds., *Earth's Oldest rocks*, Volume 15: Developments in Precambrian Geology, Elsevier, p. 339-367.
- Soler, P., and Bonhomme, M.G., 1990, Relation of magmatic activity to plate dynamics in central Peru from Late Cretaceous to present, *in* Kay, S.M., and Rapela, C.W., eds., *Plutonism from Antarctica to Alaska*, Volume 241: GSA Special Paper: Boulder, Colorado, Geological Society of America, p. 173-192.
- Sproule, R.A., Leshner, C.M., Ayer, J.A., Thurston, P.C., and Herzberg, C.T., 2002, Spatial and temporal variations in the geochemistry of komatiites and komatiitic basalts in the Abitibi greenstone belt: *Precambrian Research*, v. 115, p. 153-186.
- van Hunen, J., and van den Berg, A.P., 2008, Plate tectonics on the early Earth: limitations imposed by strength and buoyancy of subducted lithosphere: *Lithos*, v. 103, p. 217-235.
- Van Kranendonk, M.J., Hickman, A.H., Smithies, R.H., and Champion, D.C., 2007, Paleoarchean development of a continental nucleus: the East Pilbara terrane of the Pilbara craton, Western Australia, *in* Van Kranendonk, M.J., Smithies, R.H., and Bennet, V., eds., *Earth's Oldest rocks*, Volume 15: Developments in Precambrian Geology, Elsevier, p. 307-337.
- Weinberg, R., and Dunlap, W.J., 2000, Growth and Deformation of the Ladakh Batholith, Northwest Himalayas: Implications for Timing of Continental Collision and Origin of Calc-Alkaline Batholiths: *Journal of Geology*, v. 108, p. 303-320.
- Wen, D., Liu, D., Chung, S., Chu, M., Ji, J., Zhang, Q., Song, B., Lee, T., Yeh, M., and Lo, C., 2008, Zircon SHRIMP U-Pb ages of the Gangdese Batholith and implications for Neotethyan subduction in southern Tibet: *Chemical Geology*, v. 252, p. 191-201.
- Wyman, D., 2003, Upper mantle processes beneath the 2.7 Ga Abitibi belt, Canada: a trace element perspective: *Precambrian Research*, v. 127, p. 143-165.
- Wyman, D., Kerrich, R., and Polat, A., 2002, Assembly of Archean cratonic mantle lithosphere and crust: plume-arc interaction in the Abitibi-Wawa subduction-accretion complex: *Precambrian Research*, v. 115, p. 37-62.
